# Supplementary material for: Effect of Furrow Straw Mulching and Straw Decomposer Application on Celery (Apium graveolens L.) Production and Soil Improvement
Source: MDPI journal article supplement (doi:10.3390/agronomy13112774), 2023-11-06
Supplement: s1 [file s1]

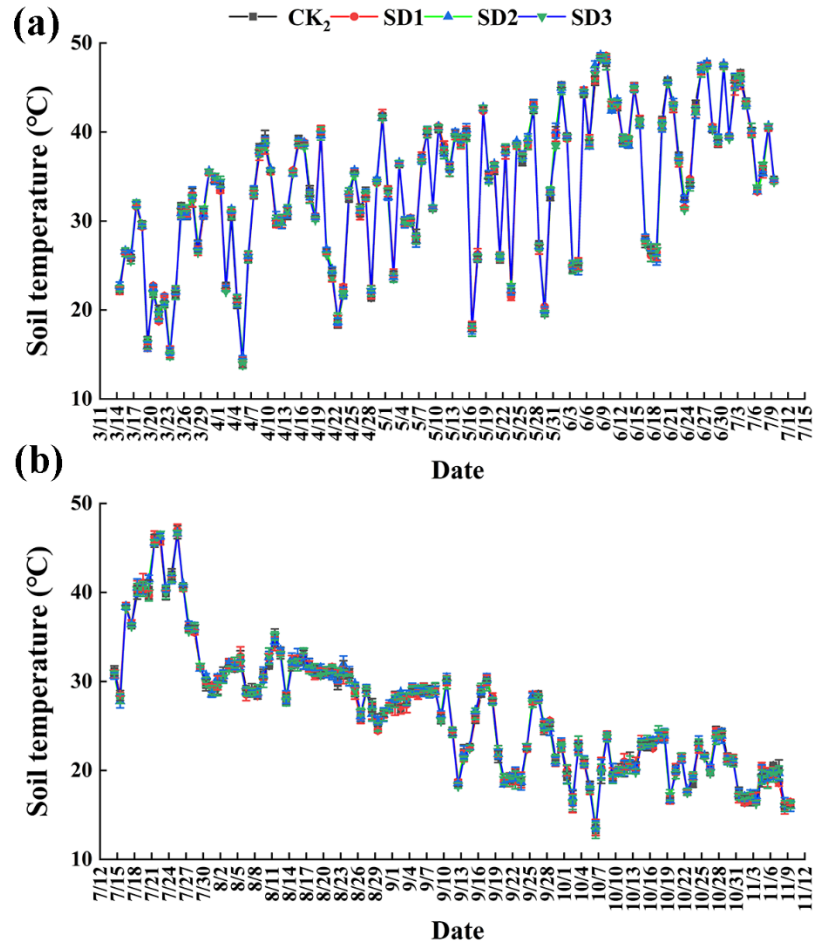

**Figure S2.** Changes of the soil temperature in the 0~10 cm soil layer of furrows after different types of straw decomposer application. CK<sub>2</sub>: no straw decomposer added. SD<sub>1</sub>: straw decomposer "JiaLefeng", SD<sub>2</sub>: straw decomposer "LanYue", SD<sub>3</sub>: straw decomposer "ZhuBang". The different lowercase letters in the figure indicate significant differences between the different treatments based on the bidirectional ANOVA tests ( $P < 0.05$ ).
