# Supplementary material for: Effect of Furrow Straw Mulching and Straw Decomposer Application on Celery (Apium graveolens L.) Production and Soil Improvement
Source: MDPI journal article supplement (doi:10.3390/agronomy13112774), 2023-11-06
Supplement: s1 [file s1]

Archive with 10 entries (10 files):
- Table S1.xlsx
- Table S2.xlsx
- Table S3.xlsx
- Table S4.xlsx
- Table S5.xlsx
- Figure S1.pdf
- Figure S2.pdf
- Figure S3.pdf
- Figure S4.pdf
- Figure S5.pdf
