# Supplementary material for: Effect of Furrow Straw Mulching and Straw Decomposer Application on Celery (Apium graveolens L.) Production and Soil Improvement
Source: MDPI journal article supplement (doi:10.3390/agronomy13112774), 2023-11-06
Supplement: s1 [file s1 › Table S1.xlsx]

## Sheet: Sheet1
Table S1 Characteristics of soil types before treatments (0-20cm soil layer)
	March to July	July to November
Clay (%)	23.1±0.4a	22.5±0.6a
Loam (%)	57.4±0.5a	57.8±0.3a
Sand (%)	19.5±0.4a	19.8±0.6a
pH	6.6±0.1a	6.6±0.1a
Note. Data are mean ± SD. Different lowercase letters in a row indicate significant differences (P < 0.05) between the nutrient contents of different straws.
