# Supplementary material for: Effect of Furrow Straw Mulching and Straw Decomposer Application on Celery (Apium graveolens L.) Production and Soil Improvement
Source: MDPI journal article supplement (doi:10.3390/agronomy13112774), 2023-11-06
Supplement: s1 [file s1 › Table S2.xlsx]

## Sheet: Sheet1
Table S2 Nutrient contents of dry straw (mg·g–1)
	Rice straw	Wheat straw
Total nitrogen	6.2±0.23b	8.43±0.18a
Total phosphorus	1.6±0.14b	2.71±0.11a
Total potassium	12.3±1.31b	20.64±0.85a
Organic carbon	456.02±31.73a	379.71±23.64b
Cellulose	402.5±24.63a	369.45±21.42b
Hemicellulose	227.4±15.77b	342.67±19.63a
Lignin	97.2±8.28a	67.85±4.58b
Note. Data are mean ± SD. Different lowercase letters in a row indicate significant differences (P < 0.05) between the nutrient contents of different straws.
