# Supplementary material for: Effect of Furrow Straw Mulching and Straw Decomposer Application on Celery (Apium graveolens L.) Production and Soil Improvement
Source: MDPI journal article supplement (doi:10.3390/agronomy13112774), 2023-11-06
Supplement: s1 [file s1 › Table S3.xlsx]

## Sheet: Sheet1
Table S3 Fertilization amount and schedule for celery (kg·ha–1)
Fertilization time	CH4N2O	Ca(H2PO4)2	K2SO4
2023-03-15	244.57	937.5	225
2023-04-15	300	/	/
2023-06-15	300	/	/
2023-07-15	244.57	937.5	225
2023-08-15	300	/	/
2023-10-15	300	/	/
