# Supplementary material for: Effect of Furrow Straw Mulching and Straw Decomposer Application on Celery (Apium graveolens L.) Production and Soil Improvement
Source: MDPI journal article supplement (doi:10.3390/agronomy13112774), 2023-11-06
Supplement: s1 [file s1 › Table S4.xlsx]

## Sheet: Sheet1
Table S4 The rate of increase in each treatment compared with CK1 under rice and wheat straw mulching
				Increase rate (%)				Increase rate (%)
			CK1Rice	S7500Rice	S11250Rice	S15000Rice	CK1Wheat	S7500Wheat	S11250Wheat	S15000Wheat	S7500Wheat/S7500Rice (%)	S11250Wheat/S11250Rice (%)	S15000Wheat/S15000Rice (%)
Soil conductivity	furrow	0~10 cm	/	-41.7769	-46.5506	-51.2001	/	-43.8063	-50.005	-55.1946	104.858	107.421	107.802
	bed	0~10 cm	/	-41.7769	-46.5506	-51.2001	/	-43.8063	-50.005	-55.1946	104.858	107.421	107.802
		10~20 cm	/	-30.4194	-32.5386	-37.6733	/	-22.4188	-26.4822	-30.2868	73.6989	81.3871	80.3933
Soil organic carbon	furrow	0~10 cm	/	44.299	57.0104	66.9394	/	41.7116	60.3774	73.0458	94.1593	105.906	109.122
	bed	0~10 cm	/	47.6834	68.0824	73.6165	/	6.65138	42.7752	43.0046	13.949	62.8286	58.4171
		10~20 cm	/	5.76756	7.76236	8.23938	/	4.55551	5.66121	7.78417	78.9849	72.9316	94.4752
Soil total nitrogen	furrow	0~10 cm	/	5.82524	7.76699	17.4757	/	3.80952	5.71429	12.381	65.3968	73.5714	70.8466
	bed	0~10 cm	/	7.69231	7.69231	10.5769	/	8.57143	10.4762	13.3333	111.429	136.19	126.061
		10~20 cm	/	13.6986	16.4384	20.5479	/	1.21951	3.65854	4.87805	8.90244	22.2561	23.7398
Soil nitrate nitrogen	furrow	0~10 cm	/	-45.6693	-55.315	-62.7953	/	-45.3027	-52.4008	-65.3445	99.1973	94.7318	104.06
	bed	0~10 cm	/	-39.5131	-48.6891	-56.367	/	-40	-50.5882	-62.7451	101.232	103.9	111.315
		10~20 cm	/	-33.7705	-44.7541	-56.0656	/	-34.2419	-48.0409	-56.2181	101.396	107.344	100.272
Soil total phosphorus	furrow	0~10 cm	/	20.2797	28.9044	35.4312	/	22.3684	48.0263	62.5	110.299	166.156	176.398
	bed	0~10 cm	/	11.4583	25.6944	35.7639	/	26.7148	29.9639	50.1805	233.147	116.616	140.311
		10~20 cm	/	16.4502	19.4805	22.5108	/	13.2743	15.0442	18.1416	80.694	77.2271	80.5905
Soil available phosphorus	furrow	0~10 cm	/	18.2762	25.5971	29.901	/	23.129	37.8661	53.3225	126.553	147.931	178.33
	bed	0~10 cm	/	15.1557	22.122	29.1677	/	16.3834	41.9085	67.4751	108.1	189.442	231.335
		10~20 cm	/	24.5405	34.043	37.0392	/	10.2562	21.3913	33.3309	41.7931	62.8362	89.9882
Soil total potassium	furrow	0~10 cm	/	1.51918	3.22826	3.38017	/	0.478469	1.06735	2.35554	31.4952	33.0629	69.6869
	bed	0~10 cm	/	19.9776	30.8338	46.3906	/	14.5946	26.8305	32.9238	73.0547	87.0164	70.9709
		10~20 cm	/	5.87629	9.43299	12.0619	/	-1.61146	0.179051	4.61056	-27.4231	1.89814	38.2243
Soil available potassium	furrow	0~10 cm	/	4.0261	14.5387	18.9189	/	9.24739	15.2816	18.1696	229.686	105.11	96.0396
	bed	0~10 cm	/	16.5737	43.9436	72.8005	/	19.2723	32.4957	43.0927	116.282	73.9487	59.1928
		10~20 cm	/	22.6489	27.5468	33.2064	/	12.9307	22.9866	31.2123	57.0918	83.4458	93.9949
Celery yield			/	6.06998	9.82687	12.177	/	7.53665	9.22739	11.7397	124.163	93.8996	96.4094
Celery total nitrogen			/	-39.485	-18.8841	-12.8755	/	-22.5352	5.6338	9.15493	57.0729	-29.8335	-71.1033
Celery total phosphorus			/	2.47934	27.2727	27.2727	/	4.37956	2.91971	9.48905	176.642	10.7056	34.7932
Celery total potassium			/	48.1865	101.036	105.181	/	15.8654	23.0769	17.7885	32.9249	22.8402	16.9122
Celery dietary fiber			/	-1.53846	-7.69231	-14.6154	/	-28.7958	-17.801	-16.7539	1871.73	231.414	114.632
Celery Vitamin C			/	0.843486	5.52952	12.5586	/	7.80834	16.9476	18.6335	925.722	306.494	148.373
Celery flavonoid			/	-25.8065	-0.806452	-11.2903	/	6.70103	17.0103	35.0515	-25.9665	-2109.28	-310.457
Celery total phenolic			/	-13.4571	33.6427	8.93271	/	13.5908	43.0615	85.98	-100.994	127.997	962.529
Note：The rate of increase=(T-CK1)/CK1×100%, where T stands for different treatments
