# Supplementary material for: Effect of Furrow Straw Mulching and Straw Decomposer Application on Celery (Apium graveolens L.) Production and Soil Improvement
Source: MDPI journal article supplement (doi:10.3390/agronomy13112774), 2023-11-06
Supplement: s1 [file s1 › Table S5.xlsx]

## Sheet: Sheet1
Table S5 The rate of increase in each treatment compared with CK2 under rice and wheat straw mulching
				Increase rate (%)				Increase rate (%)
			CK2Rice	SD1Rice	SD2Rice	SD3Rice	CK2Wheat	SD1Wheat	SD2Wheat	SD3Wheat	SD1Wheat/SD1Rice (%)	SD2Wheat/SD2Rice (%)	SD3Wheat/SD3Rice (%)
Soil conductivity	furrow	0~10 cm	/	-4.05083	-5.55997	-13.0262	/	-6.66105	-8.34739	-18.2968	164.436	150.134	140.461
	bed	0~10 cm	/	-10.1254	-12.3433	-20.0579	/	-10.7283	-12.4016	-19.685	105.955	100.472	98.1413
		10~20 cm	/	-8.86628	-11.1919	-16.7151	/	-7.45814	-9.13242	-15.9817	84.1181	81.5988	95.6125
Soil organic carbon	furrow	0~10 cm	/	0.940071	8.61731	11.2025	/	0.700935	5.99688	6.03583	74.5619	69.5911	53.8792
	bed	0~10 cm	/	2.23335	4.00462	12.8995	/	1.6687	6.06431	23.7281	74.7176	151.433	183.946
		10~20 cm	/	0.643604	2.69509	13.5157	/	0.0753864	2.56314	7.65172	11.7132	95.1038	56.6136
Soil total nitrogen	furrow	0~10 cm	/	5.30973	3.53982	4.42478	/	0	3.50877	5.26316	0	99.1228	118.947
	bed	0~10 cm	/	1.76991	0.884956	1.76991	/	0.869565	1.73913	0.869565	49.1304	196.522	49.1304
		10~20 cm	/	4.81928	-1.20482	6.0241	/	-3.26087	-5.43478	-1.08696	-67.663	451.087	-18.0435
Soil nitrate nitrogen	furrow	0~10 cm	/	-10.6667	-16	-22.2222	/	-16.0338	-22.7848	-28.692	150.316	142.405	129.114
	bed	0~10 cm	/	-14.9837	-15.9609	-27.0358	/	-5.07246	-6.52174	-22.8261	33.8532	40.8607	84.429
		10~20 cm	/	-8.93372	-9.51009	-7.78098	/	-14.7335	-15.3605	-16.6144	164.921	161.518	213.526
Soil total phosphorus	furrow	0~10 cm	/	0.350263	0.350263	4.02802	/	0.584795	1.16959	5.65302	166.959	333.918	140.342
	bed	0~10 cm	/	1.51899	2.78481	16.962	/	1.68269	2.64423	12.5	110.777	94.9519	73.694
		10~20 cm	/	0.37594	0	1.50376	/	0.735294	0.735294	1.10294	195.588	0	73.3456
Soil available phosphorus	furrow	0~10 cm	/	2.78064	3.56529	6.63803	/	1.0734	2.29393	7.50711	38.6026	64.3406	113.092
	bed	0~10 cm	/	0.276665	1.24022	7.83883	/	5.27706	5.5865	10.2901	1907.38	450.444	131.27
		10~20 cm	/	0.791451	0.964204	1.34185	/	1.03905	1.41333	1.60885	131.284	146.58	119.898
Soil total potassium	furrow	0~10 cm	/	1.85185	4.2328	6.00907	/	1.77712	4.25768	6.88634	95.9645	100.588	114.599
	bed	0~10 cm	/	2.59233	3.26705	8.41619	/	2.52912	3.19468	8.65225	97.5616	97.7849	102.805
		10~20 cm	/	0.0919963	0.413983	0.735971	/	0.469885	0.768902	0.854336	510.765	185.733	116.083
Soil available potassium	furrow	0~10 cm	/	6.38715	10.4232	16.0658	/	9.17656	14.2551	22.5201	143.672	136.763	140.174
	bed	0~10 cm	/	2.10649	8.35425	19.4156	/	5.65419	8.16155	16.0034	268.417	97.6934	82.4255
		10~20 cm	/	12.3635	12.8597	15.7129	/	3.80734	3.85657	8.50907	30.7949	29.9895	54.1535
Celery yield			/	0.895164	3.31362	4.26583	/	2.84546	4.59754	7.96246	317.87	138.747	186.657
Celery total nitrogen			/	-15.2709	-2.46305	12.3153	/	5.16129	13.5484	20	-33.7981	-550.065	162.4
Celery total phosphorus			/	16.8831	3.24675	9.74026	/	4	14	25.3333	23.6923	431.2	260.089
Celery total potassium			/	1.0101	11.1111	31.0606	/	-6.93878	7.7551	13.4694	-686.939	69.7959	43.3649
Celery dietary fiber			/	4.5045	-12.6126	-10.8108	/	-6.28931	-11.3208	-15.7233	-139.623	89.7574	145.44
Celery Vitamin C			/	0	13.9883	30.8909	/	-1.07399	25.2983	26.1933	0	180.853	84.7929
Celery flavonoid			/	31.8182	39.5455	79.5455	/	-18.3206	14.1221	46.9466	-57.5791	35.7112	59.0185
Celery total phenolic			/	-18.6368	-4.68584	39.4036	/	10.3846	21.0769	27.4615	-55.7209	-449.801	69.6929
Note：The rate of increase=(T-CK2)/CK2×100%, where T stands for different treatments
