# Supplementary figures and images for: Effect of Furrow Straw Mulching and Straw Decomposer Application on Celery (Apium graveolens L.) Production and Soil Improvement
Source: MDPI journal article supplement (doi:10.3390/agronomy13112774), 2023-11-06

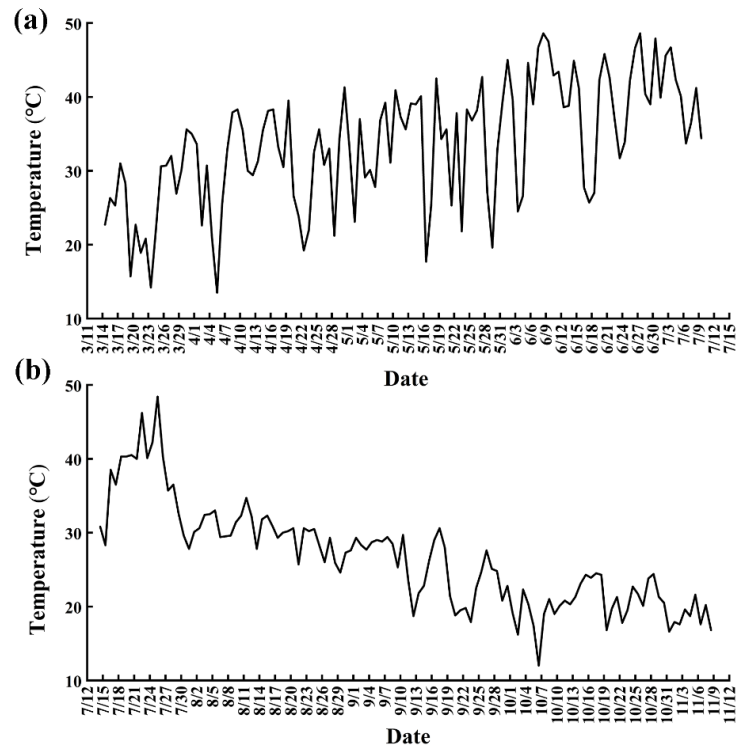

**Figure S1** Temperature variations during experiments.

Supplement: s1 [file s1]

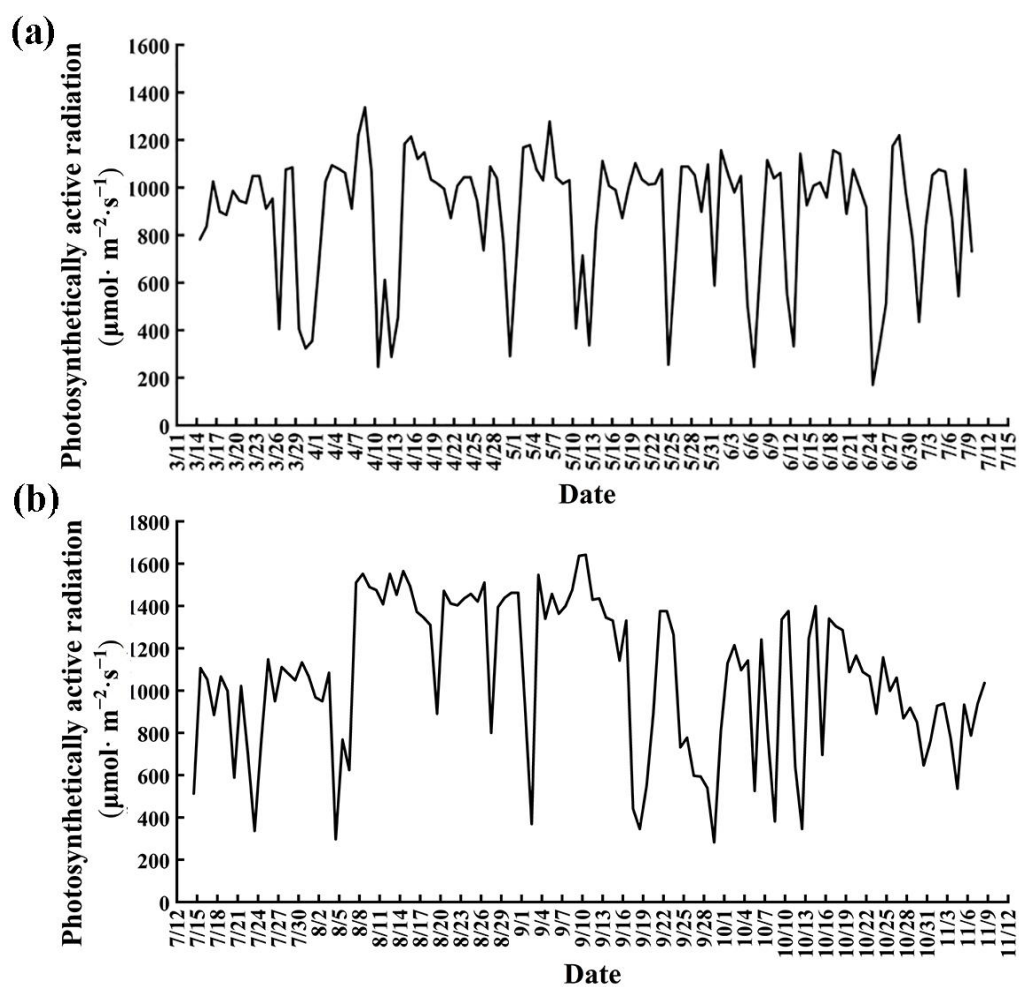

**Figure S3.** The photosynthetically active radiation during experiments.

Supplement: s1 [file s1 › Figure S3.pdf]
